# Supplementary material
Source: HighWire-hosted journal article supplement (https://erj.ersjournals.com/content/57/4/2001209)
Supplement: inline-supplementary-material-1 [file inline-supplementary-material-1.pdf]

# **LONG-TERM PROGNOSIS OF NEW ADULT-ONSET ASTHMA IN OBESE PATIENTS**

Pinja Ilmarinen, Adrienn Pardo, Leena E. Tuomisto, Iida Vähätalo, Onni Niemelä, Pentti Nieminen,

Hannu Kankaanranta

## **Supplementary material**

### **Assessment of lung function, asthma control and inflammatory parameters**

Lung function measurements were performed with a Vmax Encore 22 spirometer (Viasys Healthcare, Palm Springs, CA) that was calibrated daily. Finnish reference values were used [E1]. Post-bronchodilator measurements were taken 15 min after inhalation of salbutamol (400 µg). Fraction of exhaled nitric oxide (FeNO) was measured with a portable rapid-response chemiluminescent analyzer according to ATS standards [E2] (flow rate 50 mL/s; NIOX System, Aerocrine, Sweden). Venous blood was collected and white blood cell differential counts were determined. Total IgE levels were measured by using ImmunoCAP (Thermo Scientific, Uppsala, Sweden). Laboratory assays were performed in an accredited laboratory (SFS-EN ISO 15189:2013) of Seinäjoki Central Hospital.

### **Assessment of dispensed oral corticosteroids, ICS and adherence**

Information on dispensed oral steroids and ICS was obtained from Finnish Social Insurance Institution [E3]. Only dispensed oral steroids having indication for asthma were taken into account. If indication was missing, medical records were examined and if no other possible indication was found, indication was assumed to be asthma. Methyl prednisolone was converted into mg of prednisolone to calculate total amount of dispensed oral steroids during the whole follow-up period as prednisolone mg. To calculate patient's average annual use in mg, total amount used during the whole follow-up period was divided by patient-specific years of follow-up. Adherence to ICS

medication was evaluated by comparing the patient's dispensed doses to the prescribed doses for the whole 12-year period. Shortly, we converted all prescribed and dispensed ICS doses to budesonide equivalents and based on that information calculated annual and total 12-year adherence for each patient, as previously described [E3].

### **Bronchial challenge test**

The bronchial challenge test was carried out with histamine by a dosimetric method with controlled tidal breathing by using a nebulizer [E4]. Buffered histamine diphosphate aerosol was inhaled by the subjects in 4-fold increasing doses (0.025 mg, 0.1 mg, 0.4 mg, 1.6 mg) at 5-min intervals. The end-point was either  $\geq 15\%$  fall in FEV<sub>1</sub> or the maximum histamine dose of 1.6 mg. After the provocation, 0.4 mg of salbutamol was given via spacer. Post-bronchodilatation FEV<sub>1</sub> was measured 15 min thereafter. PD<sub>15</sub>FEV<sub>1</sub> value for histamine was calculated by interpolation [E5].

**Table S1. Inclusion and exclusion criteria of SAAS-study.**

|                    |                                                                                                                                                                                                                                                                                                                                                                                                                                                                                                                                                                                                                                                                                                                                                                                                                                                        |
|--------------------|--------------------------------------------------------------------------------------------------------------------------------------------------------------------------------------------------------------------------------------------------------------------------------------------------------------------------------------------------------------------------------------------------------------------------------------------------------------------------------------------------------------------------------------------------------------------------------------------------------------------------------------------------------------------------------------------------------------------------------------------------------------------------------------------------------------------------------------------------------|
| Inclusion criteria | <ul style="list-style-type: none"><li>• a diagnosis of new-onset asthma made by a respiratory specialist</li><li>• diagnosis confirmed by at least one of the following objective lung function measurements<sup>1</sup>:<ul style="list-style-type: none"><li>○ FEV<sub>1</sub> reversibility in spirometry of at least 15 % and 200 ml</li><li>○ diurnal variability (<math>\geq 20</math> %) or repeated reversibility (<math>\geq 15</math> %/60 L/min) in PEF-follow-up</li><li>○ a significant decrease in FEV<sub>1</sub> (15 %) or PEF (20 %) in response to exercise or allergen</li><li>○ a significant reversibility in FEV<sub>1</sub> (at least 15 % and 200 ml) or mean PEF (20 %) in response to a trial with oral or inhaled glucocorticoids</li></ul></li><li>• symptoms of asthma</li><li>• age <math>\geq 15</math> years</li></ul> |
| Exclusion criteria | <ul style="list-style-type: none"><li>• physical or mental inability to provide signed informed consent</li><li>• of note:<ul style="list-style-type: none"><li>○ patients with comorbidities, either other lung disease or any other significant disease were not excluded</li><li>○ patients were not excluded because of smoking, alcohol use or any other lifestyle factor</li></ul></li></ul>                                                                                                                                                                                                                                                                                                                                                                                                                                                     |

<sup>1</sup>The objective lung function criteria reflect those of national and international guidelines valid in 1999-2002 and may not exactly follow those valid at the moment. FEV<sub>1</sub>, forced expiratory volume in one second; PEF, peak expiratory flow; SAAS, Seinäjoki Adult Asthma Study. The table has been previously published [E6].

**Table S2. Characteristics of patients at baseline (asthma diagnosis) and 12 years of follow-up.**

|                                                              | <b>Baseline<br/>(n=203)</b>   | <b>Follow-up<br/>(n=203)</b> | <b>p value</b> |
|--------------------------------------------------------------|-------------------------------|------------------------------|----------------|
| Age (y)                                                      | 46 (14)                       | 58 (14)                      |                |
| Male gender n (%)                                            | 85 (41.9)                     | 85 (41.9)                    |                |
| BMI (kg/m <sup>2</sup> )                                     | 27.1 (24.1-29.7)              | 28.1 (24.4-31.2)             | <0.001         |
| Smokers (ex/current) n (%)                                   | 103 (50.7)                    | 107 (52.7)                   | 0.125          |
| Smoking history, pack-years                                  | 11 (5-20)                     | 16 (7-30)                    | <0.001         |
| Total IgE (kU/l)                                             | 84 (35-174)                   | 61 (24-163)                  | 0.046          |
| Daily ICS use n (%)                                          | 16 (8.0)                      | 155 (76.4)                   | <0.001         |
| Blood eosinophils (10 <sup>9</sup> /l)                       | 0.28 (0.15-0.42) <sup>†</sup> | 0.17 (0.10-0.27)             | <0.001         |
| Pre-BD FEV <sub>1</sub> %                                    | 83 (71-92)                    | 86 (76-96)                   | <0.001         |
| Pre-BD FVC %                                                 | 90 (80-100)                   | 96 (87-106)                  | <0.001         |
| Pre-BD FEV <sub>1</sub> /FVC                                 | 0.75 (0.69-0.80)              | 0.73 (0.66-0.79)             | <0.001         |
| Post-BD FEV <sub>1</sub> %                                   | 88 (77-99)                    | 90 (80-98)                   | 0.013          |
| Post-BD FVC %                                                | 94 (82-102)                   | 99 (88-107)                  | <0.001         |
| Post-BD FEV <sub>1</sub> /FVC                                | 0.79 (0.74-0.83)              | 0.75 (0.69-0.80)             | <0.001         |
| DL <sub>CO</sub> , %                                         | 97 (19)                       | 92 (19)                      | <0.001         |
| DL <sub>CO</sub> /VA, %                                      | 100 (17)                      | 94 (17)                      | <0.001         |
| AQ20 score                                                   | 7 (4-10)                      | 4 (2-7)                      | <0.001         |
| Post-BD FEV <sub>1</sub> /FVC <0.7 and pack-<br>y ≥ 10 n (%) | 16 (8.4)                      | 29 (15.2)                    | 0.001          |

Shown are mean (SD) or median (25-75 percentiles). <sup>†</sup>15.6 % with ongoing steroid –treatment. BMI = Body Mass Index, ICS = inhaled corticosteroid, BD = Bronchodilator, FVC = Forced vital capacity, DL<sub>CO</sub>=

Diffusing capacity, DL<sub>CO</sub>/VA = Diffusing capacity adjusted by the alveolar volume, AQ20 = Airways Questionnaire. Comparisons were done by paired t-test (if normally distributed), related samples Wilcoxon signed rank test (if non-normally distributed) or McNemar test (categorical variables).

**Table S3. Comparison of 12-year outcome of asthma in patients remaining obese to those who lost weight to become non-obese.**

|                                                                          | <b>Obese → obese</b> | <b>Obese → non-obese</b> | <b>P value</b>   |
|--------------------------------------------------------------------------|----------------------|--------------------------|------------------|
| <b>Subjects</b>                                                          | <b>42</b>            | <b>7</b>                 |                  |
| <b>Females n (%)</b>                                                     | 24 (57.1)            | 4 (57.1)                 | >0.999           |
| <b>Age</b>                                                               | 59 (12)              | 65 (15)                  | 0.304            |
| <b>BMI at diagnosis</b>                                                  | 33.2 (31.2-37.8)     | 30.9 (30.5-32.0)         | <b>&lt;0.001</b> |
| <b>BMI at follow-up</b>                                                  | 34.3 (32.4-37.5)     | 28.1 (25.1-28.1)         | <b>0.017</b>     |
| <b>Smoking history n (%)</b>                                             | 25 (59.5)            | 3 (42.9)                 | 0.443            |
| <b>Current smokers n (%)</b>                                             | 6 (14.3)             | 0                        | 0.574            |
| <b>Pack years of smokers</b>                                             | 22 (16)              | 29 (12)                  | 0.488            |
| <b>Atopic</b>                                                            | 12 (33.3)            | 2 (40.0)                 | >0.999           |
| <b>Daily ICS user n (%)</b>                                              | 35 (83.3)            | 7 (100.0)                | 0.573            |
| <b>Self-reported daily ICS dose, µg as budesonide equivalent</b>         | 1000 (800-1250)      | 800 (300-1400)           | 0.295            |
| <b>Average dispensed daily dose, µg budesonide equivalent</b>            | 623 (284-841)        | 709 (451-776)            | 0.629            |
| <b>Average prescribed daily dose, µg budesonide equivalent</b>           | 868 (797-1073)       | 800 (599-897)            | 0.282            |
| <b>Long-term adherence to ICS (%)</b>                                    | 67 (40)              | 88 (21)                  | 0.059            |
| <b>Asthma control<sup>a</sup></b>                                        |                      |                          | 0.320            |
| <b>Controlled n (%)</b>                                                  | 6 (14.3)             | 2 (28.6)                 |                  |
| <b>Not controlled n (%)</b>                                              | 36 (85.7)            | 5 (71.4)                 |                  |
| <b>Reported using ≥1 oral steroid burst during follow-up, n (%)</b>      | 21 (50.0)            | 2 (28.6)                 | 0.424            |
| <b>Reported use of ≥1 oral steroid burst/2 previous yrs n (%)</b>        | 19 (46.3)            | 2 (28.6)                 | 0.445            |
| <b>Dispensed oral steroids/4 previous yrs (mg prednisolone)</b>          | 150 (0-863)          | 0 (0-2000)               | 0.769            |
| <b>Dispensed oral steroids/total 12-year follow-up (mg prednisolone)</b> | 1275 (150-3003)      | 2600 (600-4040)          | 0.392            |
| <b>Any asthma-related unplanned hospitalization at follow-up n (%)</b>   | 7 (16.7)             | 0                        | 0.573            |
| <b>Pre-BD FEV<sub>1</sub> (% predicted)</b>                              | 80 (16)              | 86 (21)                  | 0.406            |
| <b>Post-BD FEV<sub>1</sub> (% predicted)</b>                             | 83 (15)              | 90 (21)                  | 0.292            |
| <b>Pre-BD FVC (% predicted)</b>                                          | 88 (16)              | 102 (19)                 | <b>0.044</b>     |
| <b>Post-BD FVC (% predicted)</b>                                         | 90 (15)              | 104 (20)                 | <b>0.033</b>     |
| <b>Pre-BD FEV<sub>1</sub>/FVC</b>                                        | 0.75 (0.70-0.79)     | 0.65 (0.62-0.73)         | <b>0.049</b>     |
| <b>Post-BD FEV<sub>1</sub>/FVC</b>                                       | 0.74 (0.08)          | 0.69 (0.10)              | 0.161            |
| <b>ACT</b>                                                               | 20 (16-22)           | 21 (13-23)               | 0.769            |
| <b>AQ20</b>                                                              | 7 (3-9)              | 5 (4-8)                  | 0.900            |
| <b>Blood eosinophils (*10<sup>9</sup>/l)</b>                             | 0.19 (0.09-0.28)     | 0.15 (0.06-0.23)         | 0.457            |
| <b>Blood neutrophils (*10<sup>9</sup>/l)</b>                             | 4.3 (1.3)            | 4.1 (1.1)                | 0.742            |
| <b>Total IgE (kU/l)</b>                                                  | 61 (29-127)          | 17 (5-198)               | 0.208            |
| <b>FeNO (ppb)</b>                                                        | 7 (5-15)             | 9 (4-16)                 | 0.886            |
| <b>IL-6 (pg/ml)</b>                                                      | 3.5 (1.9-5.4)        | 2.1 (1.2-4.9)            | 0.242            |
| <b>hs-CRP (mg/l)</b>                                                     | 2.8 (1.2-5.5)        | 0.9 (0.4-3.3)            | 0.101            |
| <b>FEV<sub>1</sub> decline (ml/yr)</b>                                   | -50 (38)             | -30 (26)                 | 0.170            |
| <b>FEV<sub>1</sub> decline (% predicted/yr)</b>                          | -0.55 (1.07)         | +0.15 (0.97)             | 0.115            |
| <b>Post-BD FEV<sub>1</sub>/FVC&lt;0.7 and pack years≥10 n (%)</b>        | 6 (14.3)             | 3 (42.9)                 | 0.105            |

<sup>a</sup>based on GINA 2010 guideline. Abbreviations: ACT= asthma control test, AQ20=Airways Questionnaire, FeNO = fraction of nitric oxide in exhaled air, IL-6=interleukin 6, hs-CRP=high sensitivity C-reactive protein, IgE=immunoglobulin E, BD = Bronchodilator, FVC = Forced vital capacity, FEV<sub>1</sub>=forced expiratory volume in 1 second. Comparisons were performed by chi-square-test (when categorical variables), independent samples t-test (if normally distributed continuous variable), independent samples Mann-Whitney U test (if non-normally distributed continuous variable).

**Table S4. Predictors for  $\geq 1$  oral corticosteroid dispensing within 12 years from diagnosis by multivariate binary regression analysis.**

|                                                 | <b>OR</b> | <b>95 % CI</b> | <b>P value</b> |
|-------------------------------------------------|-----------|----------------|----------------|
| Female                                          | 2.70      | 1.27 to 5.74   | 0.010          |
| BMI at dg <25                                   |           |                |                |
| BMI at dg 25-29.99                              | 1.06      | 0.49 to 2.30   | 0.887          |
| BMI at dg $\geq 30$                             | 3.29      | 1.18 to 9.21   | 0.023          |
| Age of onset <45yrs                             |           |                |                |
| Age of onset 45-60yrs                           | 1.40      | 0.65 to 3.00   | 0.388          |
| Age of onset >60yrs                             | 1.70      | 0.55 to 5.25   | 0.359          |
| Pack years at dg $\geq 10$                      | 1.81      | 0.74 to 4.43   | 0.192          |
| B-eos at dg $<0.20 \times 10^9/l$               | 2.61      | 1.19 to 5.74   | 0.017          |
| pre-BD FEV <sub>1</sub> at dg >80 % predicted   |           |                |                |
| pre-BD FEV <sub>1</sub> at dg 60-80 % predicted | 2.13      | 0.94 to 4.83   | 0.071          |
| pre-BD FEV <sub>1</sub> at dg <60 % predicted   | 3.13      | 0.90 to 10.95  | 0.074          |
| Asthma symptoms <16 yrs                         | 1.60      | 0.70 to 3.64   | 0.265          |

BMI = Body Mass Index, BD = Bronchodilator, B-eos = blood eosinophils, FEV<sub>1</sub> = Forced expiratory volume in 1 second. Analyzed by multivariable binary logistic regression analysis. For BMI 25-29.99 and BMI  $\geq 30$  at diagnosis, unadjusted ORs 1.17 (95% CI 0.61-2.24) and 3.36 (95% CI 1.40-8.06), respectively.

**Table S5. Self-reported use of oral corticosteroids during 12-year follow-up in patients divided according to diagnostic BMI and blood eosinophil level.**

|                                         | Low blood eosinophils at dg (<0.20)  |              |           | p-value      |
|-----------------------------------------|--------------------------------------|--------------|-----------|--------------|
|                                         | BMI<25                               | BMI 25-29.99 | BMI≥30    |              |
|                                         | n=15                                 | n=32         | n=16      |              |
| <b>Oral steroids at follow-up n (%)</b> | 3 (20.0)                             | 16 (50.0)    | 11 (68.8) | <b>0.023</b> |
|                                         | High blood eosinophils at dg (≥0.20) |              |           |              |
|                                         | BMI<25                               | BMI 25-29.99 | BMI≥30    |              |
|                                         | n=44                                 | n=53         | n=32      |              |
| <b>Oral steroids at follow-up n (%)</b> | 9 (20.5)                             | 12 (22.6)    | 12 (37.5) | <b>0.198</b> |

dg=diagnosis, BMI=body mass index. Comparisons performed by Chi-square test.

**Table S6. Comparison of asthma outcome at 12-year follow-up visit in obese (BMI $\geq$ 30) patients with high ( $\geq$ 0.20) and low ( $<$ 0.20) blood eosinophils at diagnosis.**

|                                                                              | Obese and<br>high b-eos at dg | Obese and<br>low b-eos at dg | P value |
|------------------------------------------------------------------------------|-------------------------------|------------------------------|---------|
| <b>Subjects</b>                                                              | <b>32</b>                     | <b>16</b>                    |         |
| Age, yrs                                                                     | 45 (13)                       | 52 (11)                      | 0.069   |
| Females n (%)                                                                | 19 (59.4)                     | 8 (50.0)                     | 0.555   |
| Smoking history n (%)                                                        | 17 (53.1)                     | 11 (68.8)                    | 0.363   |
| Current smoker n (%)                                                         | 3 (9.4)                       | 3 (18.8)                     | 0.386   |
| Pack years of smokers                                                        | 25 (16)                       | 19 (13)                      | 0.388   |
| BMI dg                                                                       | 32.2 (30.9-37.9)              | 33.3 (31.0-34.7)             | 0.759   |
| BMI change (dg-follow-up)                                                    | +0.9 (3.6)                    | +0.1 (4.8)                   | 0.518   |
| Atopic (skin-prick test)                                                     | 11 (42.3)                     | 3 (21.4)                     | 0.299   |
| Asthma control <sup>a</sup>                                                  |                               |                              | 0.956   |
| Well controlled                                                              | 5 (15.6)                      | 2 (12.5)                     |         |
| Partially controlled                                                         | 10 (31.3)                     | 5 (31.3)                     |         |
| Uncontrolled                                                                 | 17 (53.1)                     | 9 (56.3)                     |         |
| Pre-BD FEV <sub>1</sub> (% pred)                                             | 84 (16)                       | 75 (17)                      | 0.094   |
| Post-BD FEV <sub>1</sub> (% pred)                                            | 87 (16)                       | 78 (16)                      | 0.057   |
| Pre-BD FEV <sub>1</sub> /FVC                                                 | 0.74 (0.07)                   | 0.70 (0.10)                  | 0.121   |
| Post-BD FEV <sub>1</sub> /FVC                                                | 0.75 (0.07)                   | 0.71 (0.11)                  | 0.142   |
| FEV <sub>1</sub> decline during follow-up (ml/year)                          | -49 (30)                      | -46 (47)                     |         |
| Asthma control test score                                                    | 20 (15-22)                    | 20 (17-22)                   | 0.629   |
| AQ20 score                                                                   | 7 (4-9)                       | 6.5 (3-8)                    | 0.403   |
| Blood neutrophils (*10 <sup>9</sup> /l)                                      | 4.3 (1.3)                     | 4.2 (1.3)                    | 0.963   |
| FeNO (ppb)                                                                   | 8 (5-16)                      | 7 (5-12)                     | 0.682   |
| IL-6 (pg/ml)                                                                 | 3.3 (2.0-5.2)                 | 3.7 (1.4-6.3)                | 0.827   |
| hsCRP (mg/l)                                                                 | 3.1 (1.5-5.9)                 | 1.2 (0.6-2.7)                | 0.049   |
| Reported using oral steroids during follow-up, n (%)                         | 12 (37.5)                     | 11 (68.8)                    | 0.066   |
| Oral steroid dispensings during 12-year follow-up (mg prednisolone per year) | 64 (12-241)                   | 168 (86-353)                 | 0.043   |
| Daily ICS user at follow-up n (%)                                            | 28 (87.5)                     | 14 (87.5)                    | >0.999  |
| Self-reported ICS dose of daily users in budesonide eq $\mu$ g               | 1000 (788-1500)               | 800 (500-1000)               | 0.383   |
| ICS dispensings (average daily dose in budesonide eq $\mu$ g)                | 676 (357-860)                 | 694 (400-819)                | 0.872   |
| Average adherence to ICS (dispensed/prescribed, %)                           | 69 (38)                       | 77 (36)                      | 0.491   |
| $\geq$ 1 Hospitalizations, all respiratory-related, n (%)                    | 13 (40.6)                     | 6 (37.5)                     | >0.999  |
| All visits to healthcare/12 yrs                                              | 17 (11-26)                    | 25 (11-35)                   | 0.399   |
| Unplanned visits to healthcare/12 yrs                                        | 3 (1-8)                       | 10 (0-15)                    | 0.311   |
| Pack years $\geq$ 10 and post-BD FEV <sub>1</sub> /FVC $<$ 0.7 n (%)         | 5 (15.6)                      | 4 (25.0)                     | 0.457   |
| Number of comorbidities                                                      | 2 (1-4)                       | 3 (1-4)                      | 0.456   |

<sup>a</sup>based on GINA 2010 guideline. Data shown as mean (SD), median (25-75 percentiles) or n (%). BD=bronchodilator, FEV<sub>1</sub>=forced expiratory volume in 1 second, FVC=forced vital capacity, IL=interleukin, hsCRP=high-sensitivity C-reactive protein, AQ20=Airways Questionnaire 20, FeNO= fraction of nitric oxide in exhaled air, ICS=inhaled corticosteroid, COPD=chronic obstructive pulmonary disease. Comparisons were performed by chi-square-test (when categorical variables), independent samples t-test (if normally distributed continuous variable), independent samples Mann-Whitney U test (if non-normally distributed continuous variable).



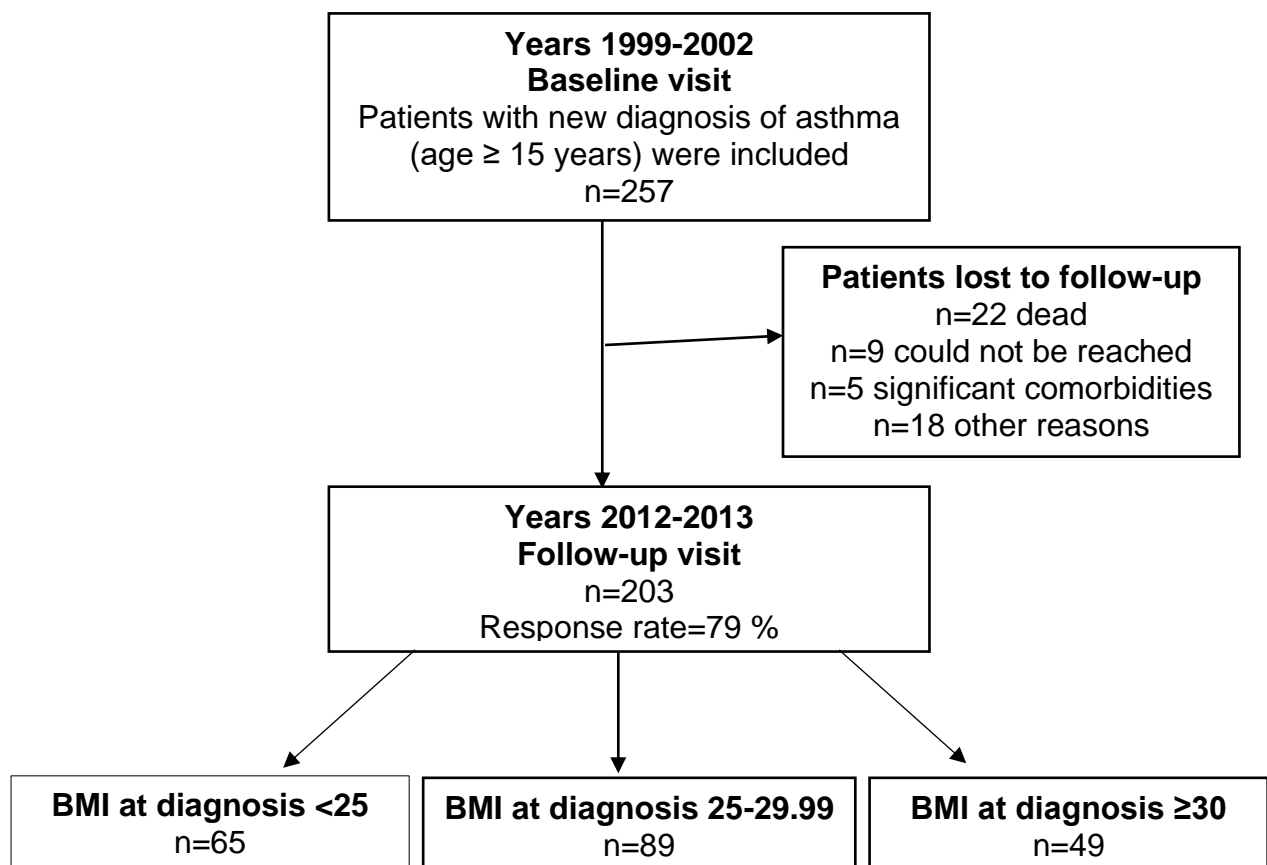

**Figure S1. Flow chart of the study.**



## E-supplement references

- E1. Viljanen AA, Halttunen PK, Kreus KE, Viljanen BC. Spirometric studies in non-smoking, healthy adults. *Scand J Clin Lab Invest Suppl* 1982;159:5-20.
- E2. American Thoracic Society, European Respiratory Society. ATS/ERS recommendations for standardized procedures for the online and offline measurement of exhaled lower respiratory nitric oxide and nasal nitric oxide, 2005. *Am J Respir Crit Care Med* 2005; 171: 912-930.
- E3. Vähätalo I, Ilmarinen P, Tuomisto LE, Tommola M, Niemelä O, Lehtimäki L, Kankaanranta H. 12-year adherence to inhaled corticosteroids in adult-onset asthma. *ERJ Open Res* 2020; 6.
- E4. Sovijärvi A, Malmberg LP, Reinikainen K, Ryttilä P, Poppius H. A rapid dosimetric method with controlled tidal breathing for histamine challenge. Repeatability and distribution of bronchial reactivity in a clinical material. *Chest* 1993; 104:164-70.
- E5. Cockcroft C, Murdock K, Mink J. Determination of histamine PC20; comparison of linear and logarithmic interpolation. *Chest* 1983;84:505–6
- E6. Kankaanranta H, Ilmarinen P, Kankaanranta T, Tuomisto LE. Seinäjoki adult asthma study (SAAS): a protocol for a 12-year real-life follow-up study of new-onset asthma diagnosed at adult age and treated in primary and specialized care. *NPJ Prim Care Resp. Med.* 2015;25:15042.
