# Supplementary material
Source: HighWire-hosted journal article supplement (https://erj.ersjournals.com/content/57/4/2001209)
Supplement: inline-supplementary-material-2 [file inline-supplementary-material-2.pdf]

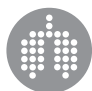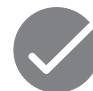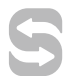

SHAREABLE PDF

# Long-term prognosis of new adult-onset asthma in obese patients

Pinja Ilmarinen <sup>1</sup>, Adrienn Pardo<sup>1</sup>, Leena E. Tuomisto <sup>1</sup>, Iida Vähätalo <sup>1</sup>, Onni Niemelä<sup>2,3</sup>, Pentti Nieminen<sup>4</sup> and Hannu Kankaanranta<sup>1,3,5</sup>

**Affiliations:** <sup>1</sup>Dept of Respiratory Medicine, Seinäjoki Central Hospital, Seinäjoki, Finland. <sup>2</sup>Dept of Laboratory Medicine, Seinäjoki Central Hospital, Seinäjoki, Finland. <sup>3</sup>Faculty of Medicine and Health Technology, Tampere University, Tampere, Finland. <sup>4</sup>Medical Informatics and Statistics Research Group, University of Oulu, Oulu, Finland. <sup>5</sup>Krefting Research Centre, Institute of Medicine, University of Gothenburg, Gothenburg, Sweden.

**Correspondence:** Pinja Ilmarinen, Dept of Respiratory Medicine, Seinäjoki Central Hospital, FIN-60220 Seinäjoki, Finland. E-mail: pinja.ilmarinen@epshp.fi

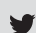

@ERSpublications

**Obese patients with new adult-onset asthma often remain obese in the long-term and have more exacerbations and respiratory-related hospital admissions during follow-up. High priority should be given to weight loss during treatment to prevent this outcome.** <https://bit.ly/2G5HtRZ>

**Cite this article as:** Ilmarinen P, Pardo A, Tuomisto LE, *et al.* Long-term prognosis of new adult-onset asthma in obese patients. *Eur Respir J* 2021; 57: 2001209 [<https://doi.org/10.1183/13993003.01209-2020>].

This single-page version can be shared freely online.

## ABSTRACT

**Background:** Obesity has been associated with poor outcomes of asthma in cross-sectional studies, but long-term effect of obesity on asthma remains unknown.

**Aims:** To study the effects of obesity, found at the time of diagnosis of adult-onset asthma, on 12-year prognosis by focusing on oral corticosteroid (OCS) use and respiratory-related hospital admissions.

**Methods:** Patients diagnosed with adult-onset asthma (n=203) were divided into three categories based on diagnostic body mass index (BMI) ( $<25 \text{ kg}\cdot\text{m}^{-2}$ ,  $25\text{--}29.9 \text{ kg}\cdot\text{m}^{-2}$ ,  $\geq 30 \text{ kg}\cdot\text{m}^{-2}$ ) and followed for 12 years as part of the Seinäjoki Adult Asthma Study. Self-reported and dispensed OCS were assessed for the 12-year period. Data on hospital admissions were analysed based on medical records.

**Results:** 12 years after diagnosis, 86% of the patients who were obese ( $\text{BMI} \geq 30 \text{ kg}\cdot\text{m}^{-2}$ ) at diagnosis remained obese. During the follow-up, no difference was found in weight gain between the BMI categories. During the 12-year follow-up, patients obese at diagnosis reported more frequent use of OCS courses (46.9% *versus* 23.1%,  $p=0.028$ ), were dispensed OCS more often (81.6% *versus* 56.9%,  $p=0.014$ ) and at higher doses (median 1350 (interquartile range 280–3180) mg *versus* 600 (0–1650) mg prednisolone,  $p=0.010$ ) compared to normal-weight patients. Furthermore, patients who were obese had more often one or more respiratory-related hospitalisations compared to normal-weight patients (38.8% *versus* 16.9%,  $p=0.033$ ). In multivariate logistic regression analyses, obesity predicted OCS use and hospital admissions.

**Conclusions:** In adult-onset asthma, patients obese at diagnosis mostly remained obese at long-term and had more exacerbations and respiratory-related hospital admissions compared to normal-weight patients during 12-year follow-up. Weight loss should be a priority in their treatment to prevent this outcome.
